# Supplementary material
Source: PubMed Central journal article supplement (PMC2672822)
Supplement: NIHMS103242-supplement-supplement_1.pdf [file NIHMS103242-supplement-supplement_1.pdf]

## **SUPPLEMENTARY MATERIAL**

### **MATERIALS AND METHODS**

#### ***Tumor tissue arrays and statistical analysis***

The prostate tissue microarrays used in this study were prepared by NYU Cooperative Prostate Cancer Tissue Resource as described previously (3). Briefly, three intermediate-density prostate tissue arrays consisted of a total 429 cases including 18 hormone resistant (HR) transurethral resection (TURP) specimens of prostate from patients with clinically advanced prostate cancer, 371 cases of HN prostate cancer tissue (Gleason Sum 6-10) from the radical prostatectomy specimens of patients with clinically localized prostate cancer, and 40 cases of non-neoplastic containing tissue from patients with benign prostatic hypertrophy. The determination of HN and HR was described previously (3). All cases upon collection into the resource (under an IRB approved protocol) had repeat pathology characterization of tissues and review of medical records.

The pair-wise group comparison was conducted by non-parametric Kruskal-Wallis test. Kaplan-Meier analysis was used for testing the association of AR3 staining and PCA recurrence. The statistical analyses were carried out by using SAS version 9.1 software (SAS Institute Inc. Cary, NC, USA).

#### ***Microarray Analysis***

Total RNA was extracted from two biological replicates of CWR-R1 and 22Rv1 cells treated with shAR3-1, shARa and the scrambled shRNA control, respectively. Hybridization was carried out using the conditions specified in the Agilent Human Whole Genome Expression system. Scanned images were processed for quality assessment and preprocessing of image data using the Agilent Feature Extraction software (Agilent Technologies). The software quantifies feature signals and their background, performs

dye normalization and calculates feature log ratios and error estimates. The error estimates, based on an extensive error model and pixel level statistics calculated from the feature and background for each spot, are used to generate a p-value for each log ratio. The differentially expressed genes were identified by their p-value  $< 0.05$  and a minimal 1.4 fold change in both cell lines treated with a given specific shRNA compared to the scrambled control. The changes of some identified genes were validated by the quantitative real-time PCR. The raw data of the microarray analysis have been deposited in the GEO database (accession # GSE13919).

# Supplementary figure 1:

## Human AR3 full-length cDNA sequence

GACACTGAATTTGGAAGGTGGAGGATTTTGTTTTTTTCTTTTAAGATCTGGGCATCTTTT  
GAATCTACCCTTCAAGTATTAAGAGACAGACTGTGAGCCTAGCAGGGCAGATCTTGTCCA  
CCGTGTGTCTTCTTCTGCACGAGACTTTGAGGCTGTCAGAGCGCTTTTTGCGTGGTTGCT  
CCCGCAAGTTTCTTCTCTGGAGCTTCCCGCAGGTGGGCAGCTAGCTGCAGCGACTACCG  
CATCATCACAGCCTGTTGAACTCTTCTGAGCAAGAGAAGGGGAGGCGGGGTAAGGGAAGT  
AGGTGGAAGATTCAGCCAAGCTCAAGGATGGAAGTGCAGTTAGGGCTGGGAAGGGTCTAC  
M E V Q L G L G R V Y  
CCTCGGCCGCGTCCAAGACCTACCGAGGAGCTTCCAGAATCTGTTCCAGAGCGTGCGC  
P R P P S K T Y R G A F Q N L F Q S V R  
GAAGTGATCCAGAACCCGGGCCCCAGGCACCCAGAGGCCGCGAGCGCAGCACCTCCCGGC  
E V I Q N P G P R H P E A A S A A P P G  
GCCAGTTTGTGCTGCAGCAGCAGCAGCAGCAGCAGCAGCAGCAGCAGCAGCAGCAGCAGCAG  
A S L L L Q Q Q Q Q Q Q Q Q Q Q Q Q Q Q Q  
CAGCAGCAGCAGCAGCAGCAGCAGCAGCAGCAGCAGCAGCAAGAGACTAGCCCCAGGCAG  
Q Q Q Q Q Q Q Q Q Q Q Q Q Q E T S P R Q  
CAGCAGCAGCAGCAGGGTGAGGATGGTTCTCCCCAAGCCATCGTAGAGGCCCCACAGGC  
Q Q Q Q Q G E D G S P Q A H R R G P T G  
TACCTGGTCTGGATGAGGAACAGCAACCTTACAGCCGCGAGTCGGCCCTGGAGTGCCAC  
Y L V L D E E Q Q P S Q P Q S A L E C H  
CCCGAGAGAGTTGCGTCCAGAGCCTGGAGCCGCGTGGCCGCCAGCAAGGGGCTGCCG  
P E R G C V P E P G A A V A A S K G L P  
CAGCAGCTGCCAGCACCTCCGGACGAGGATGACTCAGCTGCCCCATCCACGTTGTCCCTG  
Q Q L P A P P D E D D S A A P S T L S L  
CTGGGCCCCACTTCCCCGGCTTAAGCAGCTGCTCCGCTGACCTTAAAGACATCCTGAGC  
L G P T F P G L S S C S A D L K D I L S  
GAGGCCAGCACCATGCAACTCCTTACAGCAACAGCAGCAGGAAGCAGTATCCGAAGGCAGC  
E A S T M Q L L Q Q Q Q Q E A V S E G S  
AGCAGCGGGAGAGCGAGGGAGGCCTCGGGGGCTCCCACTTCCCTCCAAGGACAATTACTTA  
S S G R A R E A S G A P T S S K D N Y L  
GGGGGCACTTCGACCATTTCTGACAACGCCAAGGAGTTGTGTAAGGCAGTGTGCGTGTCC  
G G T S T I S D N A K E L C K A V S V S  
ATGGGCCTGGGTGTGGAGGCGTTGGAGCATCTGAGTCCAGGGGAACAGCTTCGGGGGGAT  
M G L G V E A L E H L S P G E Q L R G D  
TGCATGTACGCCCCACTTTTGGGAGTTCCACCCGCTGTGCGTCCCACTCCTTGTGCCCA  
C M Y A P L L G V P P A V R P T P C A P  
TTGGCCGAATGCAAAGGTTCTCTGCTAGACGACAGCGCAGGCAAGAGCACTGAAGATACT  
L A E C K G S L L D D S A G K S T E D T  
GCTGAGTATTCCCTTTTCAAGGGAGGTTACACCAAAGGGCTAGAAGGCGAGAGCCTAGGC  
A E Y S P F K G G Y T K G L E G E S L G  
TGCTCTGGCAGCGCTGCAGCAGGGAGCTCCGGGACACTTGAAGTCCCGTCTACCCTGTCT  
C S G S A A A G S S G T L E L P S T L S  
CTCTACAAGTCCGGAGCACTGGACGAGGCAGCTGCGTACCAGAGTCGCGACTACTACAAC  
L Y K S G A L D E A A A Y Q S R D Y Y N  
TTTCCACTGGCTCTGGCCGGACCGCCGCCCTCCGCGCCTCCCATCCCCACGCTCGC  
F P L A L A G P P P P P P P P H P H A R  
ATCAAGCTGGAGAACCCGCTGGACTACGGCAGCGCCTGGGCGGCTGCGGCGGCGCAGTGC  
I K L E N P L D Y G S A W A A A A A Q C  
CGCTATGGGGACCTGGCGAGCCTGCATGGCGCGGGTGCAGCGGGACCCGGTTCTGGGTCA  
R Y G D L A S L H G A G A A G P G S G S  
CCCTCAGCCGCGCTTCCCTCATCCTGGCACACTCTTTCACAGCCGAAGAAGGCCAGTTG



## Supplementary figure 2:

### Putative human AR4 full-length cDNA sequence

GACACTGAATTTGGAAGGTGGAGGATTTTGTTTTTTTCTTTTAAGATCTGGGCATCTTTT  
GAATCTACCCTTCAAGTATTAAGAGACAGACTGTGAGCCTAGCAGGGCAGATCTTGTCCA  
CCGTGTGTCTTCTTCTGCACGAGACTTTGAGGCTGTGAGAGCGCTTTTTGCGTGGTTGCT  
CCCGCAAGTTTCTTCTCTGGAGCTTCCCGCAGGTGGGCAGCTAGCTGCAGCGACTACCG  
CATCATCACAGCCTGTTGAACTCTTCTGAGCAAGAGAAGGGGAGGCGGGGTAAGGGAAGT  
AGGTGGAAGATTCAGCCAAGCTCAAGGATGGAAGTGCAGTTAGGGCTGGGAAGGGTCTAC  
M E V Q L G L G R V Y  
CCTCGGCCGCCGTCCAAGACCTACCGAGGAGCTTTCAGAATCTGTTCCAGAGCGTGCGC  
P R P P S K T Y R G A F Q N L F Q S V R  
GAAGTGATCCAGAACCCGGGCCCCAGGCACCCAGAGGCCGCGAGCGCAGCACCTCCCGGC  
E V I Q N P G P R H P E A A S A A P P G  
GCCAGTTTGTGCTGCAGCAGCAGCAGCAGCAGCAGCAGCAGCAGCAGCAGCAGCAGCAGCAG  
A S L L L Q Q Q Q Q Q Q Q Q Q Q Q Q Q Q Q  
CAGCAGCAGCAGCAGCAGCAGCAGCAGCAGCAGCAGCAGCAAGAGACTAGCCCCAGGCAGCAG  
Q Q Q Q Q Q Q Q Q Q Q Q Q E T S P R Q Q  
CAGCAGCAGCAGGGTGAGGATGGTTCTCCCCAAGCCCATCGTAGAGGCCCCACAGGCTAC  
Q Q Q Q G E D G S P Q A H R R G P T G Y  
CTGGTCCTGGATGAGGAACAGCAACCTTACAGCCGCAGTCGGCCCTGGAGTGCCACCCC  
L V L D E E Q Q P S Q P Q S A L E C H P  
GAGAGAGGTTGCGTCCCAGAGCCTGGAGCCGCCGTGGCCGCCAGCAAGGGGCTGCCCGAG  
E R G C V P E P G A A V A A S K G L P Q  
CAGCTGCCAGCACCTCCGGACGAGGATGACTCAGCTGCCCCATCCACGTTGTCCCTGCTG  
Q L P A P P D E D D S A A P S T L S L L  
GGCCCCACTTTCCCGGCTTAAGCAGCTGCTCCGCTGACCTTAAAGACATCCTGAGCGAG  
G P T F P G L S S C S A D L K D I L S E  
GCCAGCACCATGCAACTCCTTCAGCAACAGCAGCAGGAAGCAGTATCCGAAGGCAGCAGC  
A S T M Q L L Q Q Q Q Q E A V S E G S S  
AGCGGGAGAGCGAGGGAGGCCTCGGGGGCTCCCACTTCTCCAAGGACAATTACTTAGGG  
S G R A R E A S G A P T S S K D N Y L G  
GGCACTTCGACCATTTCTGACAACGCCAAGGAGTTGTGTAAGGCAGTGTCCGTGTCCATG  
G T S T I S D N A K E L C K A V S V S M  
GGCCTGGGTGTGGAGGCGTTGGAGCATCTGAGTCCAGGGGAACAGCTTCGGGGGGATTGC  
G L G V E A L E H L S P G E Q L R G D C  
ATGTACGCCCACTTTTGGGAGTTCCACCCGCTGTGCGTCCCCTCCTTGTGCCCATTC  
M Y A P L L G V P P A V R P T P C A P L  
GCCGAATGCAAAGGTTCTCTGCTAGACGACAGCGCAGGCAAGAGCACTGAAGATACTGCT  
A E C K G S L L D D S A G K S T E D T A  
GAGTATTCCCCTTTCAAGGGAGGTTACACCAAAGGGCTAGAAGGCGAGAGCCTAGGCTGC  
E Y S P F K G G Y T K G L E G E S L G C  
TCTGGCAGCGCTGCAGCAGGGAGCTCCGGGACACTTGAAGTCCCGTCTACCCTGTCTCTC  
S G S A A A G S S G T L E L P S T L S L  
TACAAGTCCGGAGCACTGGACGAGGCAGCTGCGTACCAGAGTCGCGACTACTACAACCTTT  
Y K S G A L D E A A A Y Q S R D Y Y N F  
CCACTGGCTCTGGCCGACCGCCGCCCTCCCGCCTCCCCATCCCCACGCTCGCATC  
P L A L A G P P P P P P P P H P H A R I  
AAGCTGGAGAACCCGCTGGACTACGGCAGCGCCTGGGCGGCTGCGGCGGCGCAGTGCCCG  
K L E N P L D Y G S A W A A A A A Q C R  
TATGGGGACCTGGCGAGCCTGCATGGCGGGGTGCAGCGGGACCCGGTTCTGGGTCACCC  
Y G D L A S L H G A G A A G P G S G S P  
TCAGCCGCCGCTTCTCATCCTGGCACACTCTTTCACAGCCGAAGAAGGCCAGTTGTAT



## Supplementary figure 3:

### Putative human AR5 full-length cDNA sequence

GACACTGAATTTGGAAGGTGGAGGATTTTGTTTTTTTCTTTTAAGATCTGGGCATCTTTT  
GAATCTACCCTTCAAGTATTAAGAGACAGACTGTGAGCCTAGCAGGGCAGATCTTGTCCA  
CCGTGTGTCTTCTTCTGCACGAGACTTTGAGGCTGTGAGAGCGCTTTTTGCGTGGTTGCT  
CCCGCAAGTTTCTTCTCTGGAGCTTCCCGCAGGTGGGCAGCTAGCTGCAGCGACTACCG  
CATCATCACAGCCTGTTGAACTCTTCTGAGCAAGAGAAGGGGAGGCGGGGTAAGGGAAGT  
AGGTGGAAGATTCAGCCAAGCTCAAGGATGGAAGTGCAGTTAGGGCTGGGAAGGGTCTAC  
M E V Q L G L G R V Y  
CCTCGGCCGCCGTCCAAGACCTACCGAGGAGCTTTCAGAATCTGTTCCAGAGCGTGCGC  
P R P P S K T Y R G A F Q N L F Q S V R  
GAAGTGATCCAGAACCCGGGCCCCAGGCACCCAGAGGCCGCGAGCGCAGCACCTCCCGGC  
E V I Q N P G P R H P E A A S A A P P G  
GCCAGTTTGTGCTGCAGCAGCAGCAGCAGCAGCAGCAGCAGCAGCAGCAGCAGCAGCAGCAG  
A S L L L Q Q Q Q Q Q Q Q Q Q Q Q Q Q Q Q  
CAGCAGCAGCAGCAGCAGCAGCAGCAGCAGCAGCAGCAGCAAGAGACTAGCCCCAGGCAG  
Q Q Q Q Q Q Q Q Q Q Q Q Q Q E T S P R Q  
CAGCAGCAGCAGCAGGGTGAGGATGGTTCTCCCCAAGCCCATCGTAGAGGCCCCACAGGC  
Q Q Q Q Q G E D G S P Q A H R R G P T G  
TACCTGGTCTTGATGAGGAACAGCAACCTTACAGCCGCGAGTCGGCCCTGGAGTGCCAC  
Y L V L D E E Q Q P S Q P Q S A L E C H  
CCCGAGAGAGTTGCGTCCAGAGCCTGGAGCCGCGTGGCCGCCAGCAAGGGGCTGCCG  
P E R G C V P E P G A A V A A S K G L P  
CAGCAGCTGCCAGCACCTCCGGACGAGGATGACTCAGCTGCCCCATCCACGTTGTCCCTG  
Q Q L P A P P D E D D S A A P S T L S L  
CTGGGCCCCACTTTCCTCCCGGCTTAAGCAGCTGCTCCGCTGACCTTAAAGACATCCTGAGC  
L G P T F P G L S S C S A D L K D I L S  
GAGGCCAGCACCATGCAACTCCTTACAGCAACAGCAGCAGGAAGCAGTATCCGAAGGCAGC  
E A S T M Q L L Q Q Q Q Q E A V S E G S  
AGCAGCGGGAGAGCGAGGGAGGCCTCGGGGGCTCCCACTTCTTCCAAGGACAATTACTTA  
S S G R A R E A S G A P T S S K D N Y L  
GGGGGCACTTCGACCATTTCTGACAACGCCAAGGAGTTGTGTAAGGCAGTGTGCGTGTCC  
G G T S T I S D N A K E L C K A V S V S  
ATGGGCCTGGGTGTGGAGGCGTTGGAGCATCTGAGTCCAGGGGAACAGCTTCGGGGGGAT  
M G L G V E A L E H L S P G E Q L R G D  
TGCATGTACGCCCCACTTTTGGGAGTTCCACCCGCTGTGCGTCCCACTCCTTGTGCCCA  
C M Y A P L L G V P P A V R P T P C A P  
TTGGCCGAATGCAAAGGTTCTCTGCTAGACGACAGCGCAGGCAAGAGCACTGAAGATACT  
L A E C K G S L L D D S A G K S T E D T  
GCTGAGTATTCCCTTTTCAAGGGAGGTTACACCAAAGGGCTAGAAGGCGAGAGCCTAGGC  
A E Y S P F K G G Y T K G L E G E S L G  
TGCTCTGGCAGCGCTGCAGCAGGGAGCTCCGGGACACTTGAAGTCCCGTCTACCCTGTCT  
C S G S A A A G S S G T L E L P S T L S  
CTCTACAAGTCCGGAGCACTGGACGAGGCAGCTGCGTACCAGAGTCGCGACTACTACAAC  
L Y K S G A L D E A A A Y Q S R D Y Y N  
TTTCCACTGGCTCTGGCCGGACCGCCGCCCTCCGCGCCTCCCCATCCCCACGCTCGC  
F P L A L A G P P P P P P P P H P H A R  
ATCAAGCTGGAGAACCCGCTGGACTACGGCAGCGCCTGGGCGGCTGCGGCGGCGCAGTGC  
I K L E N P L D Y G S A W A A A A A Q C  
CGCTATGGGGACCTGGCGAGCCTGCATGGCGCGGGTGCAGCGGGACCCGGTTCTGGGTCA  
R Y G D L A S L H G A G A A G P G S G S  
CCCTCAGCCGCGCTTCTCATCCTGGCACACTCTTTCACAGCCGAAGAAGGCCAGTTG





## Supplementary figure 4:

### Putative human AR6 full-length cDNA sequence

GACACTGAATTTGGAAGGTGGAGGATTTTGTTTTTTTCTTTTAAGATCTGGGCATCTTTT  
GAATCTACCCTTCAAGTATTAAGAGACAGACTGTGAGCCTAGCAGGGCAGATCTTGTCCA  
CCGTGTGTCTTCTTCTGCACGAGACTTTGAGGCTGTTCAGAGCGCTTTTTGCGTGGTTGCT  
CCCGCAAGTTTCTTCTCTGGAGCTTCCCGCAGGTGGGCAGCTAGCTGCAGCGACTACCG  
CATCATCACAGCCTGTTGAACTCTTCTGAGCAAGAGAAGGGGAGGCGGGGTAAGGGAAGT  
AGGTGGAAGATTCAGCCAAGCTCAAGGATGGGAAGTGCAGTTAGGGCTGGGAAGGGTCTAC  
M E V Q L G L G R V Y  
CCTCGGCCCGCTCCAAGACCTACCGAGGAGCTTTCAGAATCTGTTCCAGAGCGTGCGC  
P R P P S K T Y R G A F Q N L F Q S V R  
GAAGTGATCCAGAACCCGGGCCCCAGGCACCCAGAGGCCGCGAGCGCAGCACCTCCCGGC  
E V I Q N P G P R H P E A A S A A P P G  
GCCAGTTTGTGCTGCAGCAGCAGCAGCAGCAGCAGCAGCAGCAGCAGCAGCAGCAGCAGCAG  
A S L L L Q Q Q Q Q Q Q Q Q Q Q Q Q Q Q Q  
CAGCAGCAGCAGCAGCAGCAGCAGCAGCAGCAGCAGCAGCAAGAGACTAGCCCCAGGCAG  
Q Q Q Q Q Q Q Q Q Q Q Q Q Q E T S P R Q  
CAGCAGCAGCAGCAGGGTGAGGATGGTTCTCCCCAAGCCATCGTAGAGGCCCCACAGGC  
Q Q Q Q Q G E D G S P Q A H R R G P T G  
TACCTGGTCTTGATGAGGAACAGCAACCTTACAGCCGAGTCGGCCCTGGAGTGCCAC  
Y L V L D E E Q Q P S Q P Q S A L E C H  
CCCGAGAGAGTTGCGTCCAGAGCCTGGAGCCGCGTGGCCGCCAGCAAGGGGCTGCCG  
P E R G C V P E P G A A V A A S K G L P  
CAGCAGCTGCCAGCACCTCCGGACGAGGATGACTCAGCTGCCCCATCCACGTTGTCCCTG  
Q Q L P A P P D E D D S A A P S T L S L  
CTGGGCCCACTTTCCCCGGCTTAAGCAGCTGCTCCGCTGACCTTAAAGACATCCTGAGC  
L G P T F P G L S S C S A D L K D I L S  
GAGGCCAGCACCATGCAACTCCTTCAGCAACAGCAGCAGGAAGCAGTATCCGAAGGCAGC  
E A S T M Q L L Q Q Q Q Q E A V S E G S  
AGCAGCGGGAGAGCGAGGGAGGCCTCGGGGGCTCCCACTTCCCTCCAAGGACAATTACTTA  
S S G R A R E A S G A P T S S K D N Y L  
GGGGCACTTCGACCATTTCTGACAACGCCAAGGAGTTGTGTAAGGCAGTGTGCGGTGTCC  
G G T S T I S D N A K E L C K A V S V S  
ATGGGCCTGGGTGTGGAGGCGTTGGAGCATCTGAGTCCAGGGGAACAGCTTCGGGGGGAT  
M G L G V E A L E H L S P G E Q L R G D  
TGCATGTACGCCCCACTTTTGGGAGTTCCACCCGCTGTGCGTCCCACTCCTTGTGCCCA  
C M Y A P L L G V P P A V R P T P C A P  
TTGGCCGAATGCAAAGGTTCTCTGCTAGACGACAGCGCAGGCAAGAGCACTGAAGATACT  
L A E C K G S L L D D S A G K S T E D T  
GCTGAGTATTCCCTTTTCAAGGGAGGTTACACCAAAGGGCTAGAAGGCGAGAGCCTAGGC  
A E Y S P F K G G Y T K G L E G E S L G  
TGCTCTGGCAGCGCTGCAGCAGGGAGCTCCGGGACACTTGAAGTCCCGTCTACCCTGTCT  
C S G S A A A G S S G T L E L P S T L S  
CTCTACAAGTCCGGAGCACTGGACGAGGCAGCTGCGTACCAGAGTCGCGACTACTACAAC  
L Y K S G A L D E A A A Y Q S R D Y Y N  
TTTCCACTGGCTCTGGCCGGACCGCCGCCCTCCGCGCCTCCCATCCCCACGCTCGC  
F P L A L A G P P P P P P P P H P H A R  
ATCAAGCTGGAGAACCCGCTGGACTACGGCAGCGCCTGGGCGGCTGCGGCGGCGCAGTGC  
I K L E N P L D Y G S A W A A A A Q C  
CGTATGGGGACCTGGCGAGCCTGCATGGCGCGGGTGCAGCGGGACCCGGTTCTGGGTCA  
R Y G D L A S L H G A G A A G P G S G S



## Supplementary figure 5

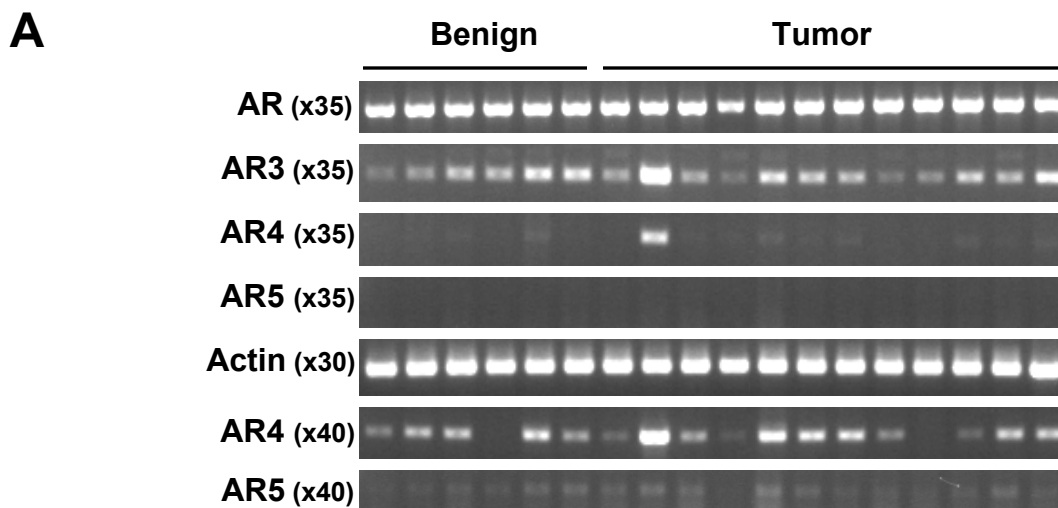

**Expression of AR, AR3, AR4 and AR5 in human prostate tissues.** Total RNA was isolated from 6 benign and 12 malignant human prostate tissues and subjected to reverse transcription-PCR. The primer sets used to amplify the AR, AR3, AR4 and AR5 isoform specific transcripts were described in methods. 30-40 cycles of amplification were used as indicated in brackets.

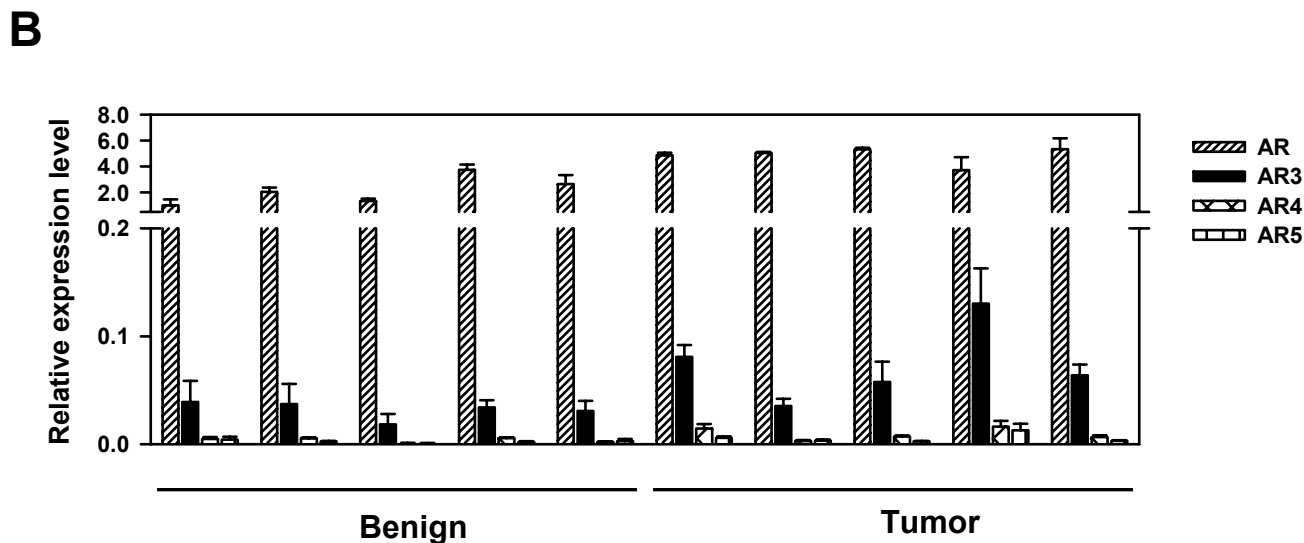

**Expression of AR, AR3, AR4 and AR5 in human prostate tissues.** Total RNA was isolated from 5 benign and 5 malignant human prostate tissues and subjected to reverse transcription-PCR. The primer sets used to amplify the AR, AR3, AR4 and AR5 isoform specific transcripts were described in methods.

## Supplementary figure 6

**a**

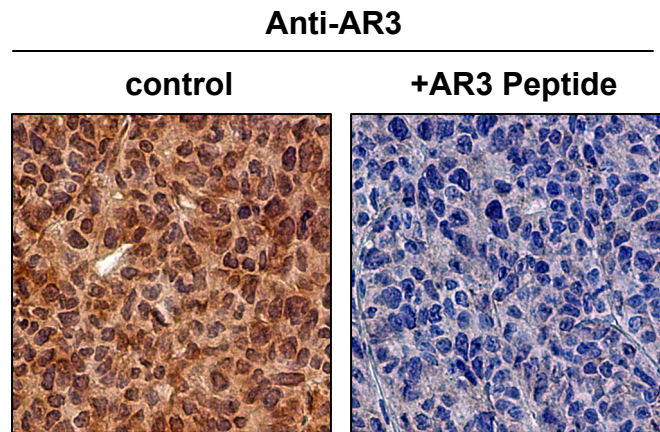

**b**

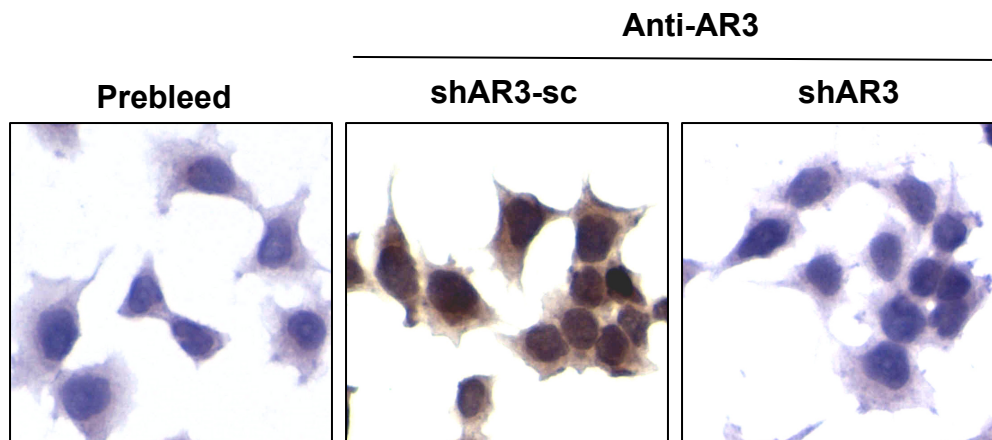

**Specificity of the anti-AR3 antibody.** (a) Prostate tissues were immunostained with anti-AR3 antibody, with or without addition of the AR3 peptides. (b) CWR-R1 cells were infected with the lentivirus encoding AR3 shRNA (shAR3) and the scrambled control AR3 shRNA (shAR3-sc). At 48 hr post infection, the cells were subjected to immunocytochemistry analysis. The same antigen retrieval procedure was used as in IHC staining of human tissues described in the Methods.

## Supplementary figure 7

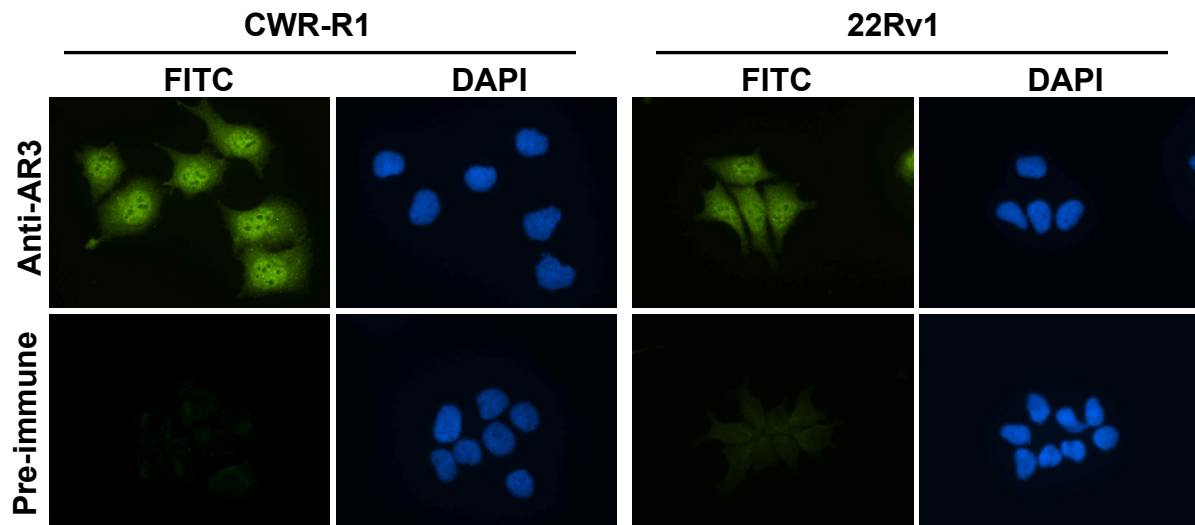

**Subcellular Localization of AR3.** CWR-R1 and 22Rv1 cells were subjected to immunofluorescence staining with anti-AR3 antibody or the control pre-immune serum. The nucleus was visualized with DAPI staining.

# Supplementary figure 8

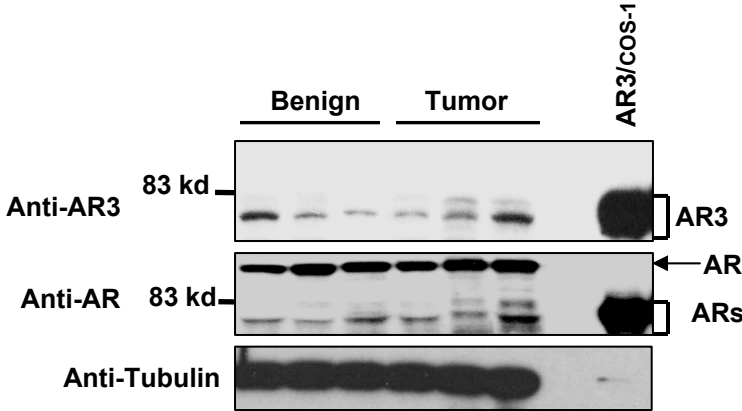

### Expression of AR3 in human prostate tissues.

The total protein extracts from human benign and cancerous prostate tissues (Gleason Grade ranged 6-7) were subjected to Western Blot with anti-AR3 and anti-AR, respectively. Overexpressed AR3 in COS-1 cells was used as a positive control. Tubulin was used as a loading control.

## Supplementary figure 9

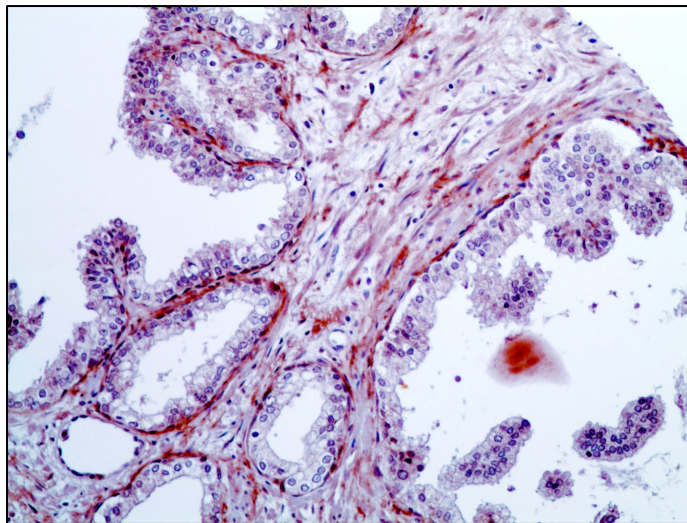

**Benign**

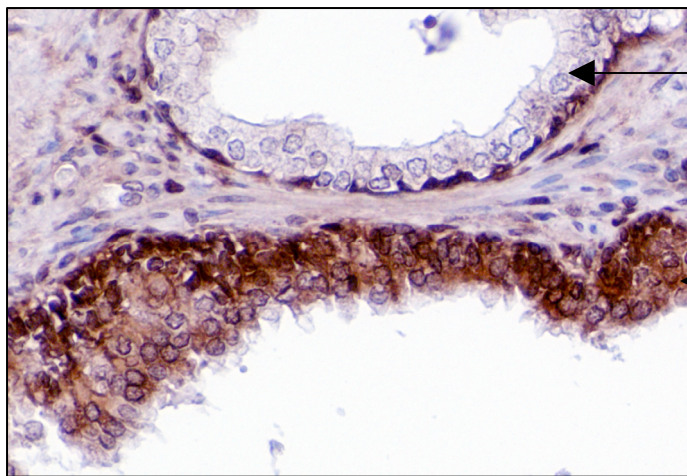

**Benign**

**PIN**

IHC staining of AR3 in human prostate tissues shows that very little staining in benign luminal epithelial cells but positive staining in basal cells and stroma. However, AR3 is detectable in the adjacent PIN lesion.



**Supplementary figure 10**

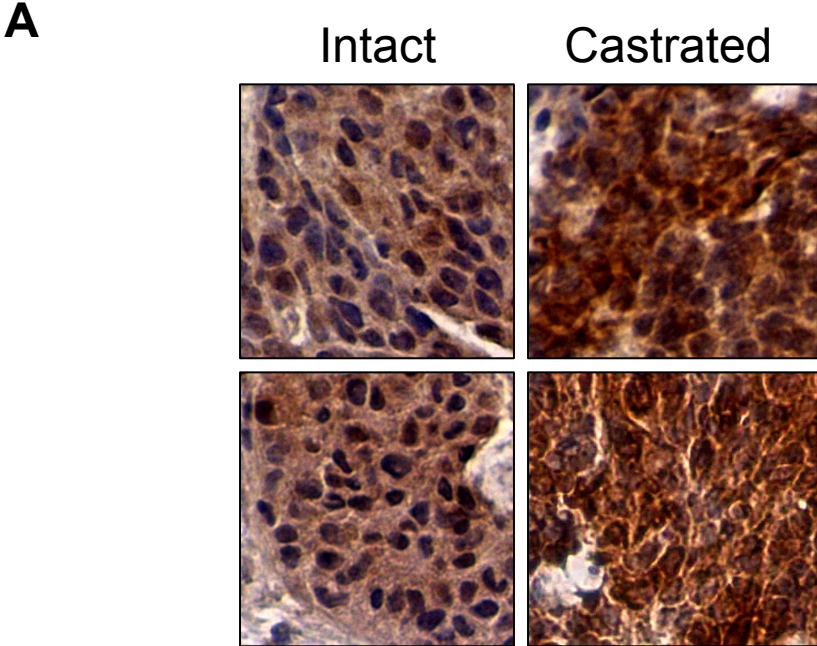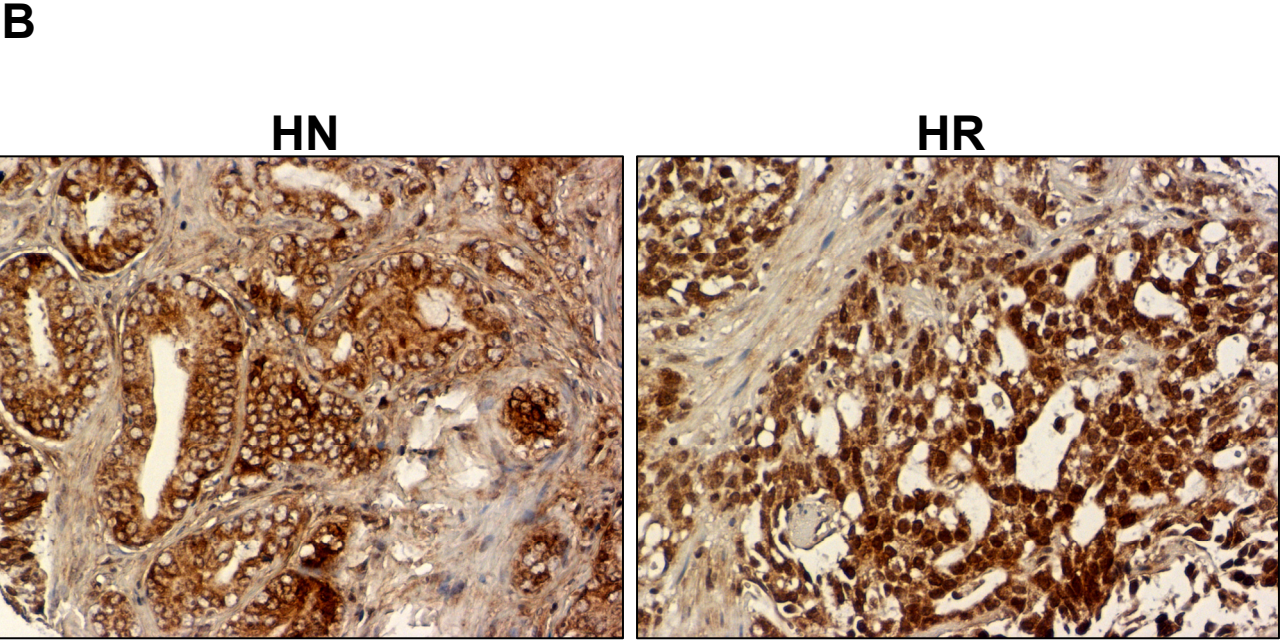

IHC staining of AR3 on two pairs of matched CWR22 xenografts derived from the intact or castrated mice (**A**) and a pair of matched human prostate tumor samples from the same patient (**B**).



## Supplementary Figure 11

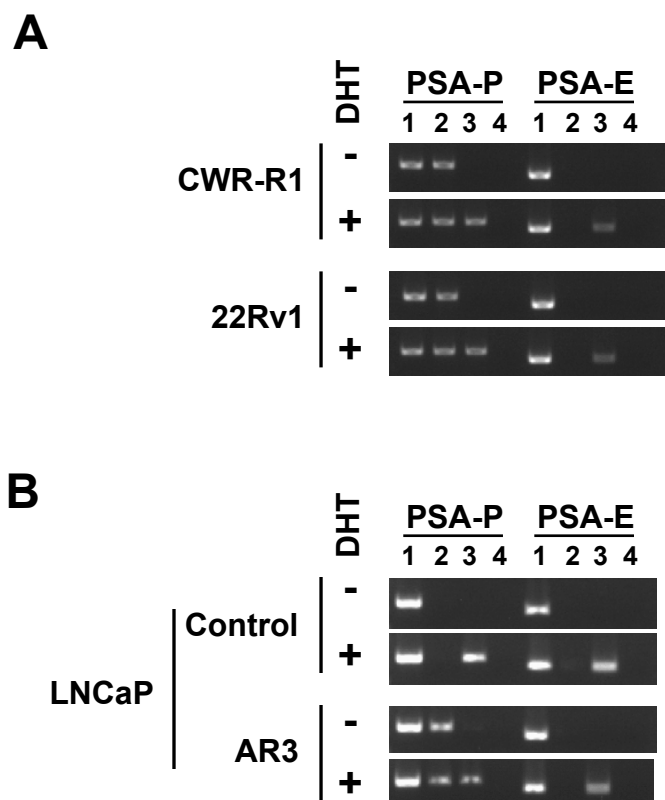

**Recruitment of AR3 to the promoter region but not the enhancer region of PSA gene.** (A) CWR-R1 and 22Rv1 cells were treated with DHT (10 nM) for 1 hr. Binding of AR3 or AR to the promoter ARE site (PSA-P) and to the enhancer ARE site (PSA-E) of human *PSA* gene was analyzed by the ChIP assay. PCR products from input (1), immunoprecipitation with anti-AR3 antibody (2), anti-AR antibody (3) or the control antibody (4), were resolved on agarose gels. (B) LNCaP cells were transfected with AR3 expressing vector or vector control. 24 hr posttransfection, the cells were treated with or without DHT (10 nM) for 1 hr and subjected to ChIP as in (A).

# Supplementary Figure 12

## Effects of AR3 or AR knock-down in CWR-R1 cells on apoptosis

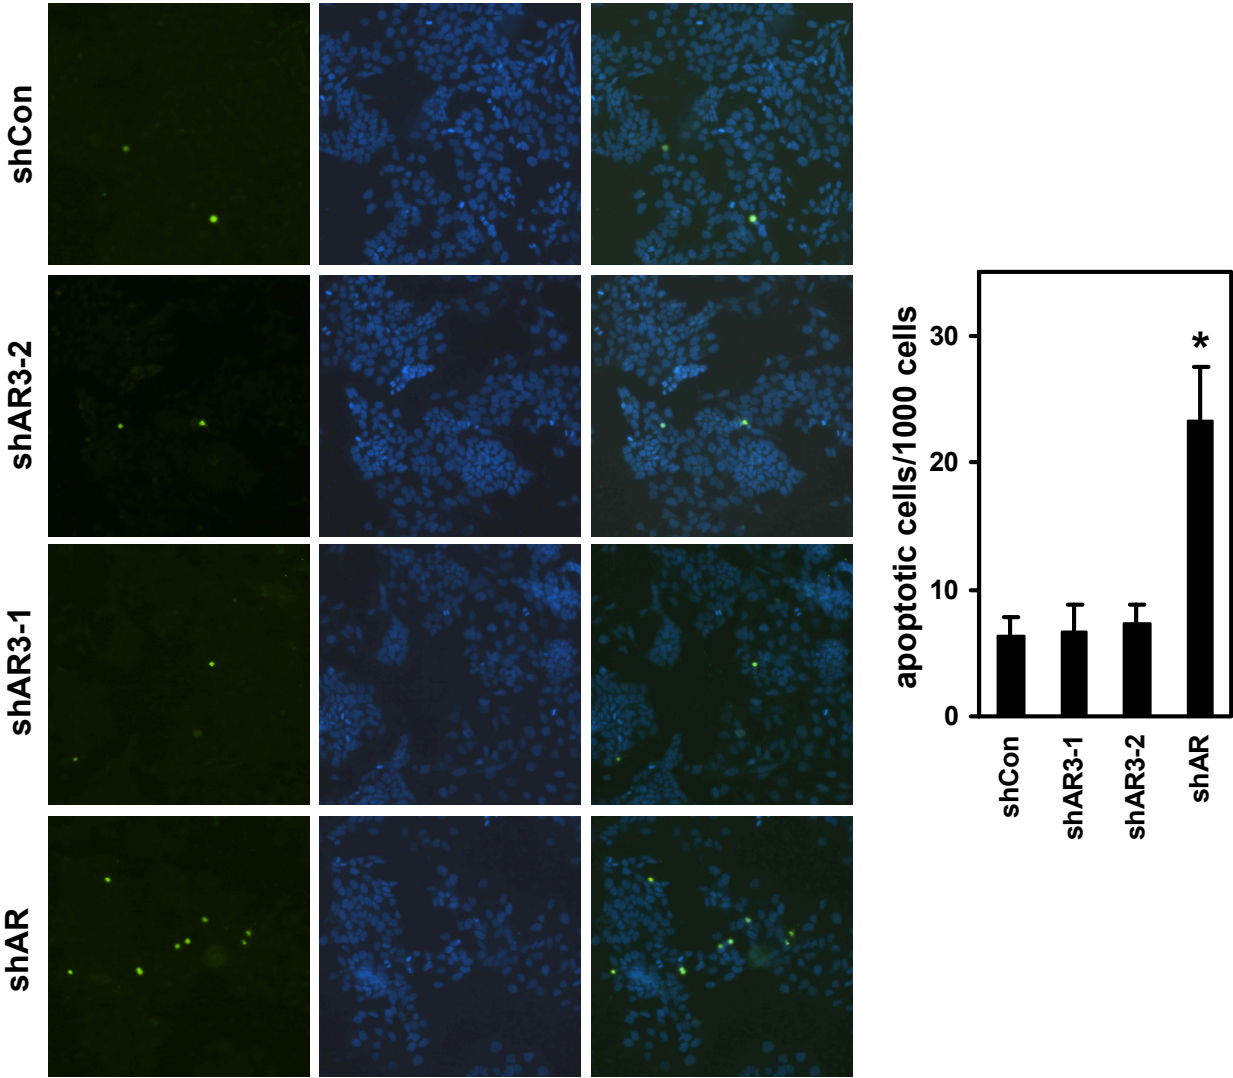

CWR-R1 cells were infected with lenti-virus encoding specific shRNA for AR3 (shAR3-1 or shAR3-2) or AR (shAR) or the scrambled control shRNA (shCon) in androgen-depleted medium. At 48 h post-infection, the apoptosis was detected by TUNEL assays. Apoptotic cells were quantified by counting TUNEL-positive cells in 1000 cells from three random independent fields. \*,  $p < 0.05$  compared with the control.

# Supplementary Figure 13

## Effects of overexpression of AR3 or AR in LNCaP cells on apoptosis

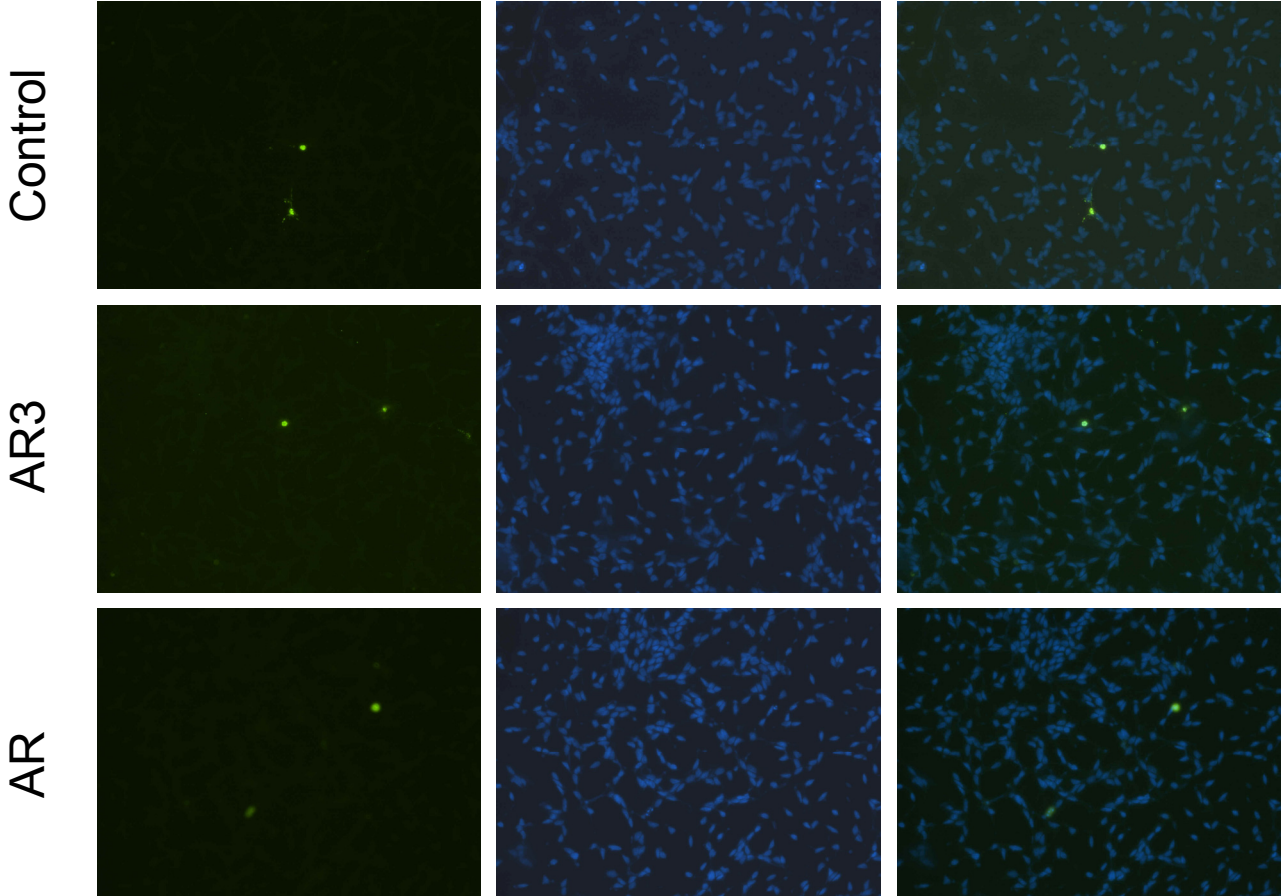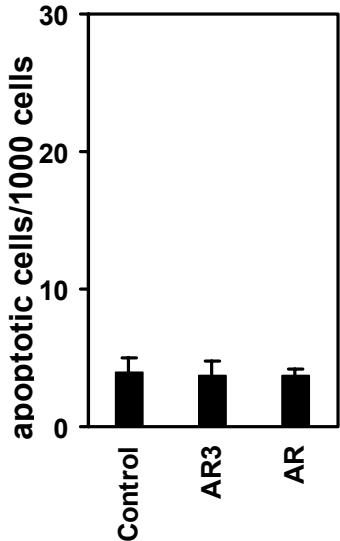

LNCaP cells were plated on poly-L-lysine-coated coverslips and infected with the lentivirus encoding the AR3 or AR expression vector or the control vector in androgen-depleted medium. At 48 h post-infection, apoptotic cells were quantified by counting TUNEL-positive cells in 1000 cells from three random independent fields.

## Supplementary Figure 14A

### Effects of overexpression of AR3 or AR in LNCaP cells on proliferation

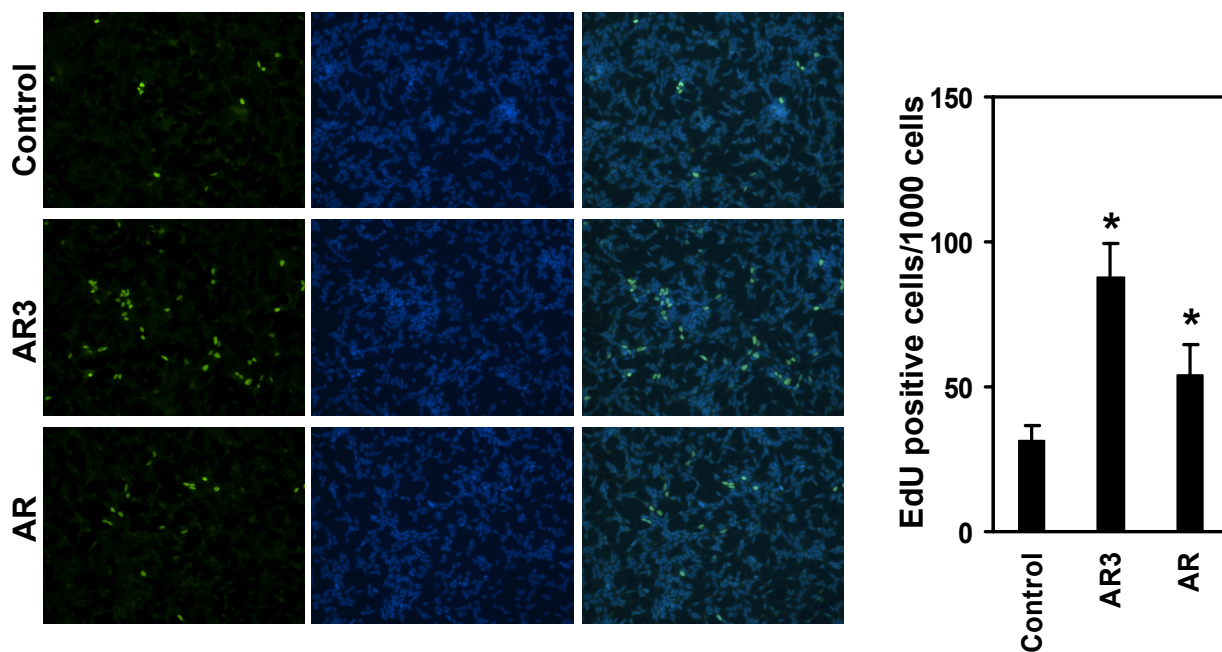

LNCaP cells were plated on poly-L-lysine-coated coverslips and infected with the *lenti*-virus encoding the AR3 or AR expression vector or empty vector (Control) in androgen-depleted medium. At 48 h post-infection, the cell proliferation was evaluated by the Click-iT™ EdU Assay (Invitrogen). Cell proliferation was quantified by counting the number of EdU-positive cells in 1000 cells from three random independent fields. \*,  $p < 0.05$  compared with the control.

EdU: an improved Thymidine analogue.

## Supplementary Figure 14B

Effects of AR3 or AR knock-down in CWR-R1 cells on proliferation

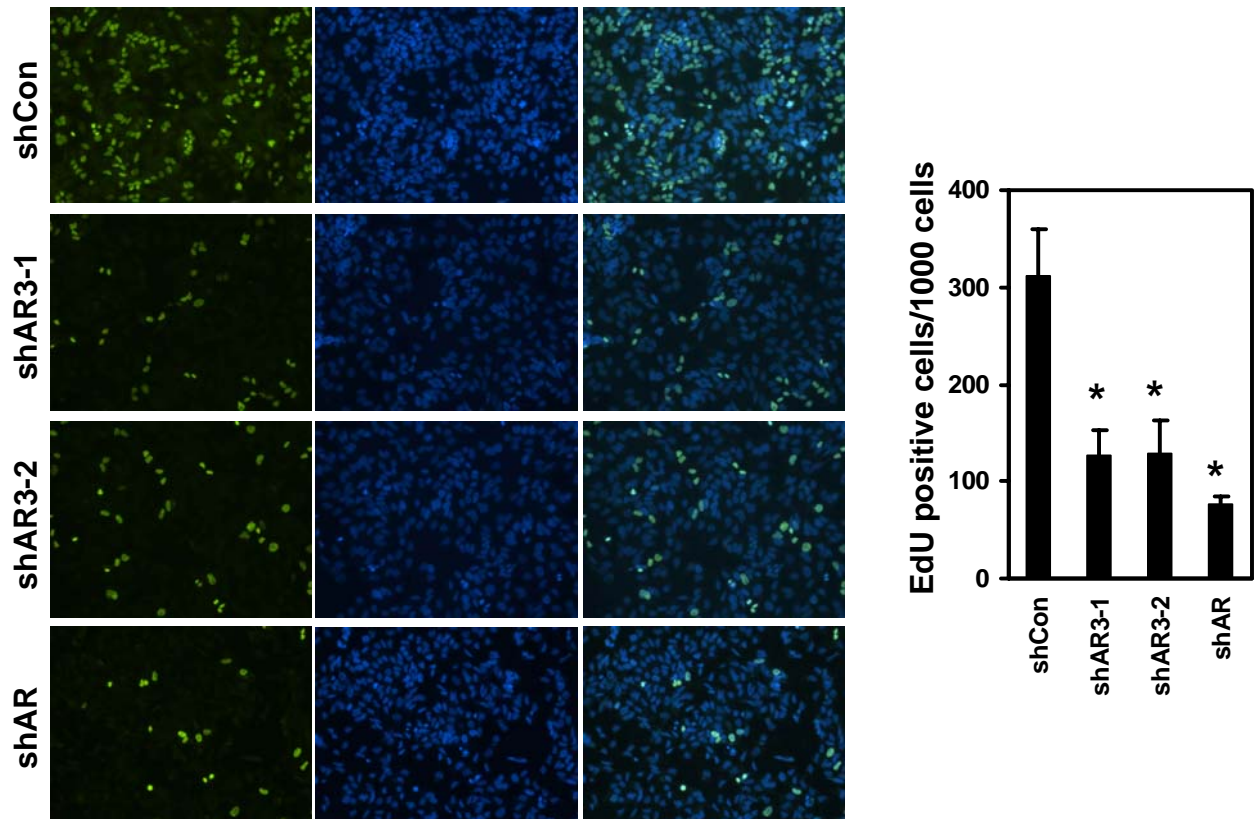

CWR-R1 cells were plated on coverslips and infected with lenti-virus encoding two specific shRNAs against AR3 (shAR3-1, shAR3-2) or AR (shAR) or scrambled control shRNA (shCon) in androgen-depleted medium. Cell proliferation was evaluated by the Click-iT™ EdU Assay as in A. \*,  $p < 0.05$  compared with the shCon.

# Supplementary Figure 15

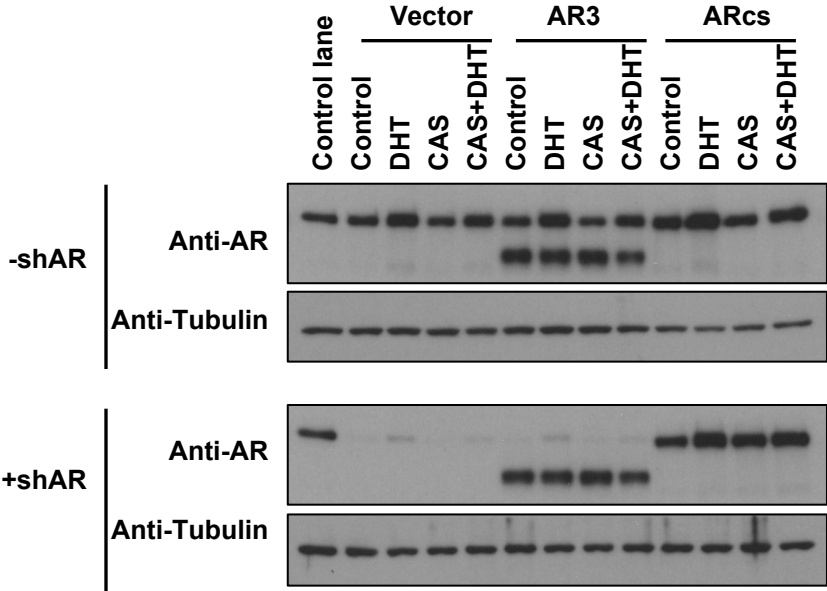

The expression level of AR and AR3 in the cell lysates used for luciferase assays described in Fig. 2D was determined by western blot with anti-AR. The first lane of each blot is served as the reference loading control for all blots. the upper panels (-shAR) were samples without shAR treatment and the lower panels (+shAR) were treated with the shAR.

# Supplementary Figure 16

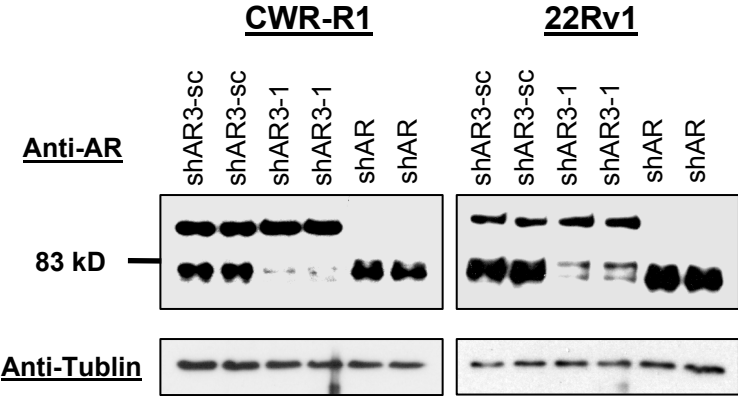

**Expression of AR proteins in CWR-R1 and 22Rv1 cells treated with AR3/AR shRNAs used in Microarray experiments.** CWR-R1 and 22Rv1 cells were infected with *lenti*-virus encoding specific shRNA against AR3 (shAR3-1) or AR (shAR) or the scrambled control shRNA (shAR3-sc). At 48 hr post-infection, the cell lysates were blotted with anti-AR and anti-Tubulin antibodies, respectively. The cells treated in parallel were subjected to RNA purification and microarray analysis.



# Supplementary Figure 17

**A**

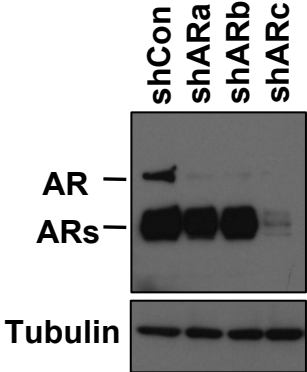

**AR shRNAs Selectively knockdown the AR long/short forms in 22Rv1 cells.** 22Rv1 cells were infected with *lenti*-virus encoding AR shRNAs (shARa, shARb, shARc) targeting different regions of AR as indicated in (Fig.1D), as well as control shRNA (shCon), at 48 h post-infection, total cell lysates were subjected to western-blot with anti-AR and anti-Tubulin antibodies, respectively.

**B**

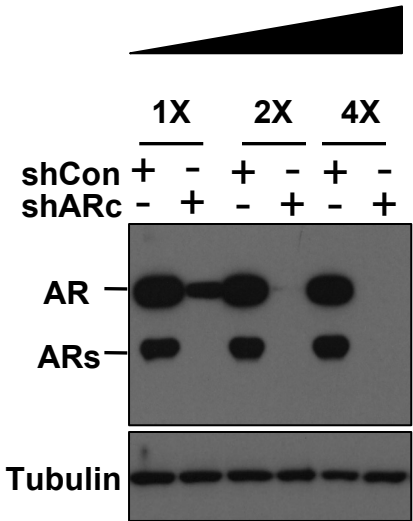

**Effects of shARc on expression of the full-length AR and the truncated form AR (ARs).** CWR-R1 cells were infected with the increasing doses of *lenti*-virus encoding AR shRNAc (shARc) and control shRNA (shCon). At 48 h post-infection, total cell lysates were subjected to western-blot with anti-AR and anti-Tubulin antibodies, respectively.



## Supplementary Figure 18

**A**

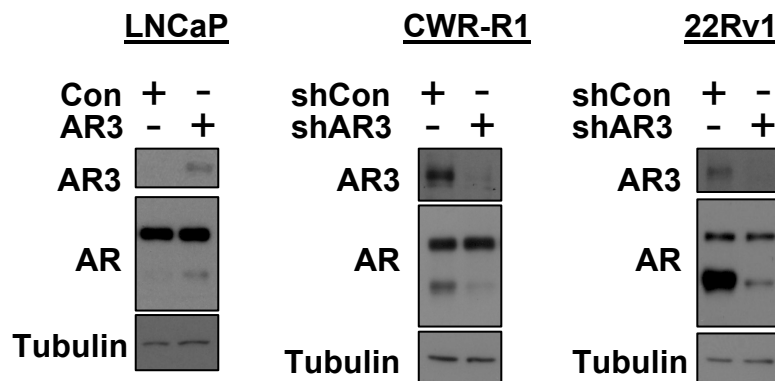

**Expression of AR proteins in LNCaP, CWR-R1 and 22Rv1 cells for tumor xenograft experiments before injection.** LNCaP cells were infected with *lenti*-virus encoding the AR3 expression vector or the control vector. CWR-R1 and 22Rv1 cells were infected with *lenti*-virus encoding specific shRNA against AR3 (shAR3) or scrambled control shRNA (shCon). At 48 hr postinfection, right before injection of the cells into the castrated mice, the cells were lysed and the cell lysates were blotted with anti-AR and anti-Tubulin antibodies, respectively.

**B**

### LNCaP xenograft

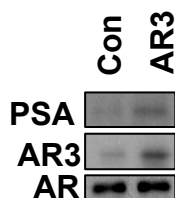

**Effect of AR3 on PSA expression in LNCaP tumor xenografts.** The Western blots of anti-PSA, anti-AR3 and anti-AR of the LNCaP xenograft tumor lysates derived from the castrated SCID mice as described in **Fig.5 B**.

## Supplementary Figure 19

### Numbers of the prostate cancer cells after viral infection

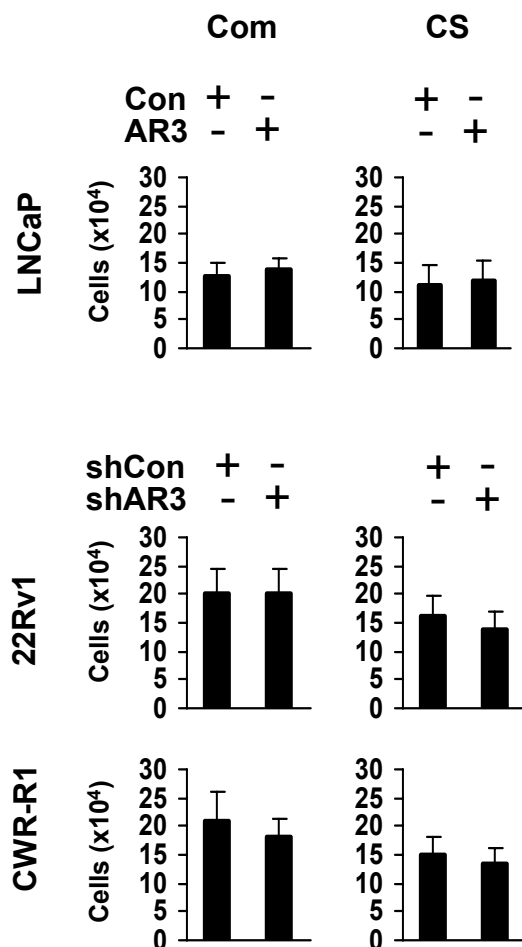

In the androgen-depleted (CS) or the regular complete (Com) medium, the LNCaP cells, CWR-R1 and 22Rv1 cells were infected with lentivirus encoding AR3 expression construct (AR3) and the control vector, or AR3 shRNA-1 (shAR3) and control shRNA (shCon) as indicated. At 48 hr after infection, the numbers of the cells were quantified using a hemocytometer and plotted on the bar graph.

## Supplementary Figure 20

### Quantification of the western-blot in Fig.1 B.

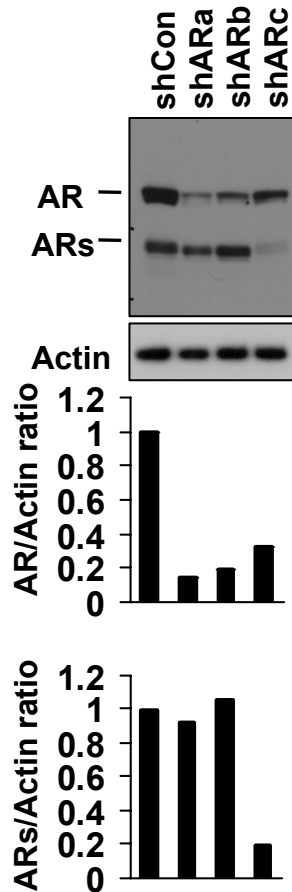

**Selective knockdown of AR long/short forms by AR shRNAs.** CWR-R1 cells were infected with the *lenti*-virus encoding AR shRNAa, AR shRNAb, AR shRNAc and control shRNA (shARa, shARb, shARc and shCon). The cell lysates were subjected to western blot with anti-AR and anti-Actin antibodies as described in **Fig. 1B**. The AR, ARs and Actin bands were quantified by densitometry analysis. The levels of AR and ARs were normalized by calculating the ratios of AR/Actin and ARs/Actin. The changes in fold compared to the control shRNA (shCon) were plotted at the bottom panels.

**Supplementary Table 1 Genes commonly regulated by AR3 and AR**

| <i>Gene symbol</i> | <i>Biological process</i>                                                    | <i>Change upon<br/>knockdown</i> |
|--------------------|------------------------------------------------------------------------------|----------------------------------|
| STK32B             | cell signaling                                                               | <b>up</b>                        |
| SYT4               | vesicular trafficking and exocytosis                                         |                                  |
| CPA1               | proteolysis, zymogen inhibition                                              |                                  |
| GIPR               | secretion of insulin, anabolic response                                      |                                  |
| GPR101             | cell signaling                                                               |                                  |
| MAGEA10            | embryonic development, tumor transformation and progression                  |                                  |
| OTOR               | cartilage development and maintenance                                        |                                  |
| ONECUT1            | transcriptional activator, liver gene transcription                          |                                  |
| IFNA10             | inflammatory response                                                        |                                  |
| ZNF224             | transcriptional regulation                                                   |                                  |
| NBN                | cellular response to DNA damage                                              |                                  |
| ITIH5              | hyaluronan metabolic process                                                 |                                  |
| ZNF624             | transcriptional regulation                                                   |                                  |
| DYNLT3             | motor activity                                                               |                                  |
| B4GALT4            | cell metabolism                                                              |                                  |
| IGFBP3             | growth factor signaling                                                      |                                  |
| PNPLA4             | lipid metabolism                                                             |                                  |
| PTPRK              | regulation of processes involving cell contact and adhesion                  |                                  |
| ANKRA2             | cell endocytosis                                                             |                                  |
| PCDH10             | cell adhesion, mesoderm development                                          |                                  |
| CD19               | B cell receptor signaling pathway                                            |                                  |
| CDH18              | cell adhesion                                                                |                                  |
| -----              |                                                                              |                                  |
| ZNF589             | DNA binding protein, transcription regulation                                | <b>down</b>                      |
| ANGPTL4            | inhibiting vascular activity as well as tumor cell motility and invasiveness |                                  |
| PDXP               | coenzyme for biochemical homeostasis                                         |                                  |
| CSRP1              | neuronal development                                                         |                                  |
| PPP5C              | RNA biogenesis and/or mitosis                                                |                                  |
| TRAF4              | adapter protein and signal transducer                                        |                                  |
| NT5DC3             | lipid metabolism                                                             |                                  |
| PPFIA3             | disassembly of focal adhesions                                               |                                  |
| SRF                | MAPK signaling pathway                                                       |                                  |
| GAS1               | tumor suppressor gene                                                        |                                  |
| LDHA               | pyruvate metabolism                                                          |                                  |
| CHRNA2             | modulation of ion-conducting channels                                        |                                  |
| TMEM81             | transmembrane cell component                                                 |                                  |
| SLC25A37           | protein transportation                                                       |                                  |
| UBE2M              | protein-ubiquitination pathway                                               |                                  |
| DHRS2              | reactive carbonyls metabolism                                                |                                  |
| SNRPB              | pre-mRNA splicing or in snRNP structure                                      |                                  |
| TPM1               | striated muscle contraction                                                  |                                  |
| SNAP23             | transport vesicle docking and fusion                                         |                                  |
| FKBP5              | protein binding, immunoregulation                                            |                                  |
| PRKAR2A            | protein transport                                                            |                                  |
| HNRPA0             | pre-mRNA splicing or in snRNP structure                                      |                                  |
| TMED9              | protein transportation and localization                                      |                                  |

## Supplementary Table 2 Genes preferentially regulated by AR

| <i>Gene symbol</i> | <i>Biological process</i>                               | <i>Change upon<br/>knockdown</i> |
|--------------------|---------------------------------------------------------|----------------------------------|
| PCDH11Y            | cell-cell recognition                                   | <b>up</b>                        |
| HOXA13             | transcription factor, involved in embryonic development |                                  |
| CDKN1A             | cell cycle progression                                  |                                  |
| PCDH9              | neuronal connections and signal transduction            |                                  |
| FAS                | apoptosis                                               |                                  |
| MYBL1              | proto-oncogene, transcription activator                 |                                  |
| TAF9B              | DNA binding, transcription regulation                   |                                  |
| -----              |                                                         |                                  |
| AR                 | transcription factor                                    | <b>down</b>                      |
| CLU                | inhibit apoptosis                                       |                                  |
| WNK3               | serine-threonine protein kinase, cell signaling         |                                  |
| TCF3               | transcription factor in cell differentiation            |                                  |
| IL6ST (gp130)      | cytokine signal transduction                            |                                  |
| TERT               | oncogenesis, cellular senescence                        |                                  |
| DACH2              | transcriptional cofactor                                |                                  |
| TMEPAI             | Androgen induced gene                                   |                                  |
| KLK3               | serine proteases, biomarker for prostate cancer         |                                  |
| KLK15              | serine proteases, cancer biomarker                      |                                  |
| CLDN4              | component of cell tight junctions                       |                                  |
| CDC2               | cell cycle regulation                                   |                                  |
| WNT3               | embryogenesis                                           |                                  |
| WNT10B             | Inhibition of adipogenesis                              |                                  |

**Supplementary Table 3 Genes preferentially regulated by AR3**

| <i>Gene symbol</i>  | <i>Biological process</i>                              | <i>Change upon knockdown</i> |             |
|---------------------|--------------------------------------------------------|------------------------------|-------------|
| EPHA3               | Ephrin receptor, cell signaling                        | <b>up</b>                    |             |
| AF268194 (IRA2)     | cell signaling                                         |                              |             |
| Neuralin-1          | BMP (bone morphogenetic protein) pathway               |                              |             |
| OPTN                | TNF-alpha signaling pathway                            |                              |             |
| RYR2                | Cardiac muscle ryanodine receptor                      |                              |             |
| SCML2               | transcription repression                               |                              |             |
| RFX3                | transcription factor                                   |                              |             |
| AI278811 (MYC like) | transcription factor, proto-oncogene                   |                              |             |
| EFCBP2              | EF-hand calcium binding protein 2                      |                              |             |
| TES                 | Zinc finger ion binding protein                        |                              |             |
| SLC40A1             | solute carrier, iron-regulated transporter             |                              |             |
| SLC7A11             | amino acid transport                                   |                              |             |
| RGMB                | cell membrane lipid-anchor                             |                              |             |
| SYTL2               | vesicle trafficking                                    |                              |             |
| APOLD1              | angiogenesis                                           |                              |             |
| DMD                 | actin binding, cytoskeletal anchoring                  |                              |             |
| NTNG1               | neurite outgrowth                                      |                              |             |
| GLUD1               | nitrogen metabolism                                    |                              |             |
| -----               | -----                                                  |                              | <b>down</b> |
| AKT1                | Proto-oncogene, Serine/threonine-kinase                |                              |             |
| AKT1S1              | Akt-mTOR pathway                                       |                              |             |
| WNK1                | Serine/threonine-kinase, signal transduction           |                              |             |
| MAP4K4              | MAP Kinase Pathways                                    |                              |             |
| ADCY6               | signal transduction                                    |                              |             |
| PICK1               | organize subcellular localization of membrane proteins |                              |             |
| HDAC3               | chromatin modification, epigenetic                     |                              |             |
| SELENBP1            | Golgi protein transport                                |                              |             |
| EVI5                | regulator of cell cycle progression                    |                              |             |
| ELK1                | Ets family transcriptional factor, proto-oncogene      |                              |             |
| SLC2A4RG            | transcription factor                                   |                              |             |
| ARFGAP1             | membrane trafficking and vesicle transport             |                              |             |
| PRG2                | immune response                                        |                              |             |
| PLEKHA3             | lipid binding                                          |                              |             |
| DNM2                | receptor mediated endocytosis                          |                              |             |
| MDM4                | Proto-oncogene, p53 binding protein                    |                              |             |
| RAP1GAP             | GTPase activity, cell signaling                        |                              |             |
| CD2BP2              | snRNP assembly                                         |                              |             |
| FXR2                | RNA binding                                            |                              |             |
| SCUBE1              | adhesive molecule                                      |                              |             |
| TPM1                | striated muscle contraction                            |                              |             |
| AP3M1               | vesicles trafficking                                   |                              |             |
| KDELR2              | endoplasmic reticulum protein trafficking              |                              |             |
| RAB6IP1             | Rab6-mediated GTPase signaling                         |                              |             |
| TSR2                | signal transduction                                    |                              |             |
| GYS1                | glycogen synthase 1, glucose metabolism                |                              |             |
| LIMD1               | tumor-suppressor gene                                  |                              |             |
| ARNTL2              | circadian rhythms                                      |                              |             |
| EMD                 | nuclear envelope assembling                            |                              |             |
| METTL7A             | methyltransferase, chromatin modification              |                              |             |
| HOXB7               | transcription factor, inhibition of differentiation    |                              |             |
| MDFI                | transcription repressor, inhibition of differentiation |                              |             |
| TAF9B               | DNA binding, transcription regulation                  |                              |             |
